# Supplementary material for: Progress toward SHAPE Constrained Computational Prediction of Tertiary Interactions in RNA Structure
Source: Noncoding RNA. 2021 Nov 5;7(4):71. doi: 10.3390/ncrna7040071 (PMC8628965; doi:10.3390/ncrna7040071)
Supplement: Supplementary file 1 [file ncrna-07-00071-s001.zip › Supplementary_table S1.xlsx]

## Sheet: Feuil1
Base number	X-ray				MD							Base	1M7_Mg - 1M7	NMIA_Mg - NMIA	BzCN_Mg - BzCN	1M7-BzCN	1M7 - NMIA	NMIA - BcCN	53 - 37
1	cWW				cWW							G
2	cWW				cWW							G
3	cWW				cWW							U
4	cWW				cWW							U
5	cWW				cWW	tWS						G
6		cWW 1HB	tSW	O2'		cWW 1Hb	tSW	O2'				G		PROTECTION
7					cWW	tWB						G		PROTECTION
8	cWW				cWW							U
9	cWW				cWW							U		EXPOSITION			PROTECTION	PROTECTION
10	cWW				cWW							G
11	cWW				cWW							G						PROTECTION
12	cWW				cWW							G	EXPOSITION
13		O2'/B				O2'/H	O2'/W	O2P/B	O2'/B			A			PROTECTION	EXPOSITION
14		W/O2'				W/O2'	O2'/H	O2P/B				A						PROTECTION	EXPOSITION
15	cWW				cWW	O2'/H	O2'/W					G
16	cWW				cWW							U
17	cWW				cWW	O2P/B						A
18	cWW				cWW							U
19	cWW				cWW							C	EXPOSITION
20	cWW				cWW							A
21	cWW				cWW							U
22	cWW				cWW							G
23	cWW				cWW							G
24		cWW 1HB				cWW 1HB	tWW					C
25		O2'/H	W/O2P			O2'/H	W/O2P					U							EXPOSITION
26						cWW	O2'/B					A	PROTECTION		PROTECTION				EXPOSITION
27	cWW (KL)	O2'/H			cWW (KL)	O2'/H						A	PROTECTION	PROTECTION	PROTECTION				EXPOSITION
28	cWW (KL)	W/O2P			cWW (KL)	W/O2P						U			PROTECTION	PROTECTION			EXPOSITION
29	cWW (KL)				cWW (KL)							C							EXPOSITION
30		cWW 1HB				cWW 1HB	tWW					A							EXPOSITION
31	cWW				cWW							C
32	cWW				cWW							C
33	cWW				cWW							A
34	cWW				cWW							U
35	cWW				cWW							G
36	cWW				cWW							A
37	cWW				cWW							U
38	cWW				cWW	O2'/B	O2P/B					G
39	cWW				cWW							C
40		W/O2'				W/O2'						A
41		O2'/B	O2'/W	W/O2'		O2'/H	O2'/B	O2'/W	W/O2'	cWS		A
42	cWW				cWW							U			PROTECTION
43	cWW				cWW	O2'/B						C
44	cWW				cWW	O2P/B						G
45	cWW				cWW							G
46		tWW				tWW	O2'B					G
47	cWW				cWW							U
48	cWW				cWW							U			EXPOSITION	PROTECTION
49	cWW				cWW							G			EXPOSITION	PROTECTION		EXPOSITION
50	cWW				cWW							A
51	cWW				cWW							A
52	cWW				cWW							C
53	cWW				cWW							A
54	cWW				cWW							C
55		tWW										U	PROTECTION						EXPOSITION
56		O2'/H	W/O2P									U	PROTECTION	PROTECTION					EXPOSITION
57		S/O2'			cWW	S/O2'						A	PROTECTION						EXPOSITION
58		O2'/H	tSS			tSS	O2'/W	O2'/B				A
59		tWW	W/O2P		cWW	cWB	B/O2P					U
60		cWW				cWW						U							EXPOSITION
61	cWW				cWW							G							EXPOSITION
62	cWW				cWW							G
63	cWW				cWW	tHS	O2'/B					G
64	cWW				cWW	cWB						U							EXPOSITION
65	cWW	O2'/B			cWW	O2'/B						U
66		tBW				O2'/H	O2'/B	O2P/B				A
67		tWW				tWW	O2'/H	O2'/S	O2'/C8			A	PROTECTION			EXPOSITION			EXPOSITION
68		W/O2				tWS	O2'/S	O2'/C8	O2'/B			A	PROTECTION		PROTECTION				EXPOSITION
69	cWW				cWW	O2P/W	O2P/B					A	PROTECTION		PROTECTION				EXPOSITION
70	cWW				cWW	cWH	O2P/W	O2P/B				C
71	cWW				cWW	tHS						G
72	cWW	tSS			cWW	tSS	O2'/W					G
73		tWW				tWW	O2'/H					U
74						tHS						G
75	cWW				cWW							G	PROTECTION
76	cWW				cWW							G
77	cWW				cWW							G
78						tWH	O2'/B	O2P/W	O2P/B			G	EXPOSITION	EXPOSITION		EXPOSITION
79						O2'/B	O2P/B					A	EXPOSITION
80						O2P/B						C	EXPOSITION		EXPOSITION			EXPOSITION
81	cWW (KL)				cWW (KL)							G	PROTECTION		PROTECTION				EXPOSITION
82	cWW (KL)				cWW (KL)	O2P/W						A	PROTECTION	PROTECTION	PROTECTION
83	cWW (KL)				cWW (KL)	tWH						U				PROTECTION	EXPOSITION	EXPOSITION
84	cWW				cWW	O2P/B						C
85	cWW				cWW	O2P/B						C
86	cWW				cWW							C
87												G	PROTECTION	PROTECTION
88		O2'/H	W/O2P			O2'/H	W/O2P	tHS	S/O2'			U		PROTECTION
89		S/O2'				S/O2'						A	PROTECTION	PROTECTION	PROTECTION
90		tSS	O2'/H			tSS	O2'/H	S/O2'	O2'/B	O2P/B		A	PROTECTION	PROTECTION	PROTECTION				EXPOSITION
91		W/O2P				O2P/B	W/O2P					C
92						tWW	tHS	O2'/B				A	EXPOSITION	EXPOSITION	EXPOSITION	PROTECTION		EXPOSITION
93												U	EXPOSITION		EXPOSITION
94	cWW	O2P/W			cWW							C
95	cWW	S/O2'			cWW	S/O2'						C
96	cWW				cWW							G
97	cWW				cWW							U
98	cWW	W/O2			cWW	O2'/B	O2P/B					C
99	cWW				cWW							C	PROTECTION
100		O2'/H										U	PROTECTION	PROTECTION	PROTECTION				EXPOSITION
101		O2'/B				O2'/B	O2'/S	O2'/C8				A	PROTECTION	PROTECTION	PROTECTION				EXPOSITION
102		O2'/H	S/O2'			tHS	S/O2'	O2P/B	O2'/C8			A	PROTECTION	PROTECTION	PROTECTION				EXPOSITION
103		tWW				O2'/B	O2P/B	cWS				C	PROTECTION		PROTECTION
104	cWW				cWW	tWS	O2'/S	O2'/C8				G	PROTECTION		PROTECTION
105	cWW				cWW	O2'/B	O2'/C8	O2P/B				G			PROTECTION
106						cWH	O2P/B					C
107		O2P/W				O2P/W	O2P/B					G
108						O2'/W	O2'/B	B/O2P				A
109						tWH	O2'/H	O2'/B	O2P/B			C
110		tWH				O2'/H	O2'/W	O2'/B				A	EXPOSITION
111	cWW (PK)				cWW (PK)	O2'/W	O2P/B					G							EXPOSITION
112	cWW (PK)				cWW (PK)							A							EXPOSITION
113	cWW (PK)				cWW (PK)							C				PROTECTION			EXPOSITION
114	cWW (PK)				cWW (PK)							U							EXPOSITION
115	cWW (PK)				cWW (PK)							G	PROTECTION						EXPOSITION
116						cWW	O2'B					C
117						tWW	O2'B	O2P/B	tHS	cHS	O2'/H	A
118						tHS	cHS					C
119					cWW	cWS	O2'/H					G							EXPOSITION
120	cWW	S/O2'			cWW	S/O2'	cWB					G
121	cWW				cWW	O2'/C8						C
122	cWW				cWW							C
123	cWW				cWW							C				PROTECTION
124		cWW				cWW						U
125	cWW				cWW	O2'/B	cWB	O2P/B				G
126	cWW				cWW							C
127	cWW	S/O2'			cWW	S/O2'						C
128					cWW	O2'/W	O2P/B					U
129						O2P/B						C	EXPOSITION	EXPOSITION	EXPOSITION
130						O2'/W	O2'/B	O2'/C8				U	EXPOSITION		EXPOSITION			EXPOSITION
131												U	EXPOSITION			PROTECTION
132					cWW	O2'/B	O2'/C8					A			EXPOSITION
133	cWW				cWW							G
134	cWW	tSS			cWW	tSS	O2'/W					G	PROTECTION
135	cWW				cWW							U
136	cWW				cWW							G
137	cWW				cWW							U
138	cWW				cWW							G
139	cWW				cWW							U
140	cWW				cWW							U
141	cWW				cWW							C
142	cWW				cWW							A		PROTECTION					EXPOSITION
143	cWW	H/O2'			cWW	H/O2'						A							EXPOSITION
144		tWW	H/O2'			tWW	H/O2'					U							EXPOSITION
145		Bs/O2P				cWH	O2P/B					G				EXPOSITION		PROTECTION
146		O2'/W	O2'/W	tWH		O2'/W	tWH	cWS	O2'/B			A						PROTECTION
147		O2' /H	cWH			O2' /H	cWH					A	PROTECTION		PROTECTION		PROTECTION	PROTECTION
148	cWW (PK)				cWW(PK)							C	PROTECTION
149	cWW (PK)				cWW(PK)							A	PROTECTION	PROTECTION	PROTECTION				EXPOSITION
150	cWW (PK)				cWW(PK)							G	PROTECTION		PROTECTION				EXPOSITION
151	cWW (PK)				cWW(PK)							U	PROTECTION	PROTECTION	PROTECTION				EXPOSITION
152	cWW (PK)				cWW(PK)							C	PROTECTION	PROTECTION	PROTECTION	PROTECTION			EXPOSITION
153						O2'/W	O2'/B					G	PROTECTION
154	cWW				cWW							U
155	cWW				cWW	O2'/B						U
156	cWW				cWW							C
157	cWW				cWW							C
158		O2'/H	tSH			O2'/H	tSH	O2P/W				G
159		W/O2'				W/O2'	O2'/H	cWS	tWS			A
160		O2'/H				O2'/H						A	PROTECTION	PROTECTION
161		tSH	O2P/H			tSW	tSH	O2P/H	O2P/W			A				EXPOSITION	EXPOSITION	EXPOSITION	PROTECTION
162	cWW	O2P/H	O2'/Bs		cWW	O2'/Bs	O2P/H					G
163	cWW				cWW							G
164	cWW				cWW							A					PROTECTION
165	cWW				cWW	O2'/B						A
166						O2'/W	O2'/B	O2P/B	cWS			G
167		O2' /H	H/O2P	B/O2P		O2' /H	O2'/B	cWH				C
168		tWH				tWH	B/O2P	cWS				A	PROTECTION				PROTECTION
169		tBW				cWW						U
170	cWW	Bs/O2P			cWW	B/O2P	cWH					C
171	cWW	cWH	H/O2P		cWW							C			EXPOSITION	PROTECTION			EXPOSITION
172	cWW				cWW	O2P/B						G
173	cWW				cWW	O2'/B						G					PROTECTION		EXPOSITION
174		W/O2'	tWH			tWH	W/O2'					U	PROTECTION
175		O2'/W				O2'/W	O2'/B					A		PROTECTION			PROTECTION
176												U
177	cWW				cWW							C
178	cWW				cWW							C
179	cWW				cWW							C
180	cWW				cWW							A
181	cWW				cWW							A
182					cWW	cWW	tWB					G		PROTECTION	PROTECTION	PROTECTION		EXPOSITION	EXPOSITION
183		cWW				cWW						A							EXPOSITION
184	cWW				cWW	W/O2'						C
185	cWW	W/O2'			cWW	W/O2'	cWS	tWS				A
186	cWW				cWW							A				PROTECTION
187	cWW				cWW							U
188	cWW				cWW							C

## Sheet: Feuil2
1	0.7	1	1	1	1	1	1	1	1	5
2	0.7	2	1	2	1	1			2	5
3	0.7	3	1	3	1	1			3	5
4	0.7	4	1	4	1	1			4	5
5	0.7	5	1	5	1	1			5	5
6	0.7	6	-0.2	6	1	1			6	5
7	0.7	7	-0.2	7	1	1			7	5
8	0.7	8	1	8	1	1			8	5
9	0.7	9	1	9	1	1			9	5
10	0.7	10	1	10	1	1			10	5
11	0.7	11	1	11	1	1			11	5
12	0.7	12	1	12	1	1			12	5
13	0.7	13	1	13	-0.2	1			13	5
14	0.7	14	1	14	1	1			14	-0.2
15	0.7	15	1	15	1	1			15	5
16	0.7	16	1	16	1	1			16	5
17	0.7	17	1	17	1	1			17	5
18	0.7	18	1	18	1	1			18	5
19	0.7	19	1	19	1	1			19	5
20	0.7	20	1	20	1	1			20	5
21	0.7	21	1	21	1	1			21	5
22	0.7	22	1	22	1	1			22	5
23	0.7	23	1	23	1	1			23	5
24	0.7	24	1	24	1	1			24	5
25	0.7	25	1	25	1	1			25	-0.2
26	-0.2	26	1	26	-0.2	1			26	-0.2
27	-0.2	27	-0.2	27	-0.2	1			27	-0.2
28	0.7	28	1	28	-0.2	-0.2			28	-0.2
29	0.7	29	1	29	1	1			29	-0.2
30	0.7	30	1	30	1	1			30	-0.2
31	0.7	31	1	31	1	1			31	5
32	0.7	32	1	32	1	1			32	5
33	0.7	33	1	33	1	1			33	5
34	0.7	34	1	34	1	1			34	5
35	0.7	35	1	35	1	1			35	5
36	0.7	36	1	36	1	1			36	5
37	0.7	37	1	37	1	1			37	5
38	0.7	38	1	38	1	1			38	5
39	0.7	39	1	39	1	1			39	5
40	0.7	40	1	40	1	1			40	5
41	0.7	41	1	41	1	1			41	5
42	0.7	42	1	42	-0.2	1			42	5
43	0.7	43	1	43	1	1			43	5
44	0.7	44	1	44	1	1			44	5
45	0.7	45	1	45	1	1			45	5
46	0.7	46	1	46	1	1			46	5
47	0.7	47	1	47	1	1			47	5
48	0.7	48	1	48	1	-0.2			48	5
49	0.7	49	1	49	1	-0.2			49	5
50	0.7	50	1	50	1	1			50	5
51	0.7	51	1	51	1	1			51	5
52	0.7	52	1	52	1	1			52	5
53	0.7	53	1	53	1	1			53	5
54	0.7	54	1	54	1	1			54	5
55	-0.2	55	1	55	1	1			55	-0.2
56	-0.2	56	-0.2	56	1	1			56	-0.2
57	-0.2	57	1	57	1	1			57	-0.2
58	0.7	58	1	58	1	1			58	5
59	0.7	59	1	59	1	1			59	5
60	0.7	60	1	60	1	1			60	-0.2
61	0.7	61	1	61	1	1			61	-0.2
62	0.7	62	1	62	1	1			62	5
63	0.7	63	1	63	1	1			63	5
64	0.7	64	1	64	1	1			64	-0.2
65	0.7	65	1	65	1	1			65	5
66	0.7	66	1	66	1	1			66	5
67	-0.2	67	1	67	1	1			67	-0.2
68	-0.2	68	1	68	-0.2	1			68	-0.2
69	-0.2	69	1	69	-0.2	1			69	-0.2
70	0.7	70	1	70	1	1			70	5
71	0.7	71	1	71	1	1			71	5
72	0.7	72	1	72	1	1			72	5
73	0.7	73	1	73	1	1			73	5
74	0.7	74	1	74	1	1			74	5
75	-0.2	75	1	75	1	1			75	5
76	0.7	76	1	76	1	1			76	5
77	0.7	77	1	77	1	1			77	5
78	0.7	78	1	78	1	1			78	5
79	0.7	79	1	79	1	1			79	5
80	0.7	80	1	80	1	1			80	5
81	-0.2	81	1	81	-0.2	1			81	-0.2
82	-0.2	82	-0.2	82	-0.2	1			82	5
83	0.7	83	1	83	1	-0.2			83	5
84	0.7	84	1	84	1	1			84	5
85	0.7	85	1	85	1	1			85	5
86	0.7	86	1	86	1	1			86	5
87	-0.2	87	-0.2	87	1	1			87	5
88	0.7	88	-0.2	88	1	1			88	5
89	-0.2	89	-0.2	89	-0.2	1			89	5
90	-0.2	90	-0.2	90	-0.2	1			90	-0.2
91	0.7	91	1	91	1	1			91	5
92	0.7	92	1	92	1	-0.2			92	5
93	0.7	93	1	93	1	1			93	5
94	0.7	94	1	94	1	1			94	5
95	0.7	95	1	95	1	1			95	5
96	0.7	96	1	96	1	1			96	5
97	0.7	97	1	97	1	1			97	5
98	0.7	98	1	98	1	1			98	5
99	-0.2	99	1	99	1	1			99	5
100	-0.2	100	-0.2	100	-0.2	1			100	-0.2
101	-0.2	101	-0.2	101	-0.2	1			101	-0.2
102	-0.2	102	-0.2	102	-0.2	1			102	-0.2
103	-0.2	103	1	103	-0.2	1			103	5
104	-0.2	104	1	104	-0.2	1			104	5
105	0.7	105	1	105	-0.2	1			105	5
106	0.7	106	1	106	1	1			106	5
107	0.7	107	1	107	1	1			107	5
108	0.7	108	1	108	1	1			108	5
109	0.7	109	1	109	1	1			109	5
110	0.7	110	1	110	1	1			110	5
111	0.7	111	1	111	1	1			111	-0.2
112	0.7	112	1	112	1	1			112	-0.2
113	0.7	113	1	113	1	-0.2			113	-0.2
114	0.7	114	1	114	1	1			114	-0.2
115	-0.2	115	1	115	1	1			115	-0.2
116	0.7	116	1	116	1	1			116	5
117	0.7	117	1	117	1	1			117	5
118	0.7	118	1	118	1	1			118	5
119	0.7	119	1	119	1	1			119	-0.2
120	0.7	120	1	120	1	1			120	5
121	0.7	121	1	121	1	1			121	5
122	0.7	122	1	122	1	1			122	5
123	0.7	123	1	123	1	-0.2			123	5
124	0.7	124	1	124	1	1			124	5
125	0.7	125	1	125	1	1			125	5
126	0.7	126	1	126	1	1			126	5
127	0.7	127	1	127	1	1			127	5
128	0.7	128	1	128	1	1			128	5
129	0.7	129	1	129	1	1			129	5
130	0.7	130	1	130	1	1			130	5
131	0.7	131	1	131	1	-0.2			131	5
132	0.7	132	1	132	1	1			132	5
133	0.7	133	1	133	1	1			133	5
134	-0.2	134	1	134	1	1			134	5
135	0.7	135	1	135	1	1			135	5
136	0.7	136	1	136	1	1			136	5
137	0.7	137	1	137	1	1			137	5
138	0.7	138	1	138	1	1			138	5
139	0.7	139	1	139	1	1			139	5
140	0.7	140	1	140	1	1			140	5
141	0.7	141	1	141	1	1			141	5
142	0.7	142	-0.2	142	1	1			142	-0.2
143	0.7	143	1	143	1	1			143	-0.2
144	0.7	144	1	144	1	1			144	-0.2
145	0.7	145	1	145	1	1			145	5
146	0.7	146	1	146	1	1			146	5
147	-0.2	147	1	147	-0.2	1			147	5
148	-0.2	148	1	148	1	1			148	5
149	-0.2	149	-0.2	149	-0.2	1			149	-0.2
150	-0.2	150	1	150	-0.2	1			150	-0.2
151	-0.2	151	-0.2	151	-0.2	1			151	-0.2
152	-0.2	152	-0.2	152	-0.2	-0.2			152	-0.2
153	-0.2	153	1	153	1	1			153	5
154	0.7	154	1	154	1	1			154	5
155	0.7	155	1	155	1	1			155	5
156	0.7	156	1	156	1	1			156	5
157	0.7	157	1	157	1	1			157	5
158	0.7	158	1	158	1	1			158	5
159	0.7	159	1	159	1	1			159	5
160	-0.2	160	-0.2	160	1	1			160	5
161	0.7	161	1	161	1	1			161	5
162	0.7	162	1	162	1	1			162	5
163	0.7	163	1	163	1	1			163	5
164	0.7	164	1	164	1	1			164	5
165	0.7	165	1	165	1	1			165	5
166	0.7	166	1	166	1	1			166	5
167	0.7	167	1	167	1	1			167	5
168	-0.2	168	1	168	1	1			168	5
169	0.7	169	1	169	1	1			169	5
170	0.7	170	1	170	1	1			170	5
171	0.7	171	1	171	1	-0.2			171	-0.2
172	0.7	172	1	172	1	1			172	5
173	0.7	173	1	173	1	1			173	-0.2
174	-0.2	174	1	174	1	1			174	5
175	0.7	175	-0.2	175	1	1			175	5
176	0.7	176	1	176	1	1			176	5
177	0.7	177	1	177	1	1			177	5
178	0.7	178	1	178	1	1			178	5
179	0.7	179	1	179	1	1			179	5
180	0.7	180	1	180	1	1			180	5
181	0.7	181	1	181	1	1			181	5
182	0.7	182	-0.2	182	-0.2	-0.2			182	-0.2
183	0.7	183	1	183	1	1			183	-0.2
184	0.7	184	1	184	1	1			184	5
185	0.7	185	1	185	1	1			185	5
186	0.7	186	1	186	1	-0.2			186	5
187	0.7	187	1	187	1	1			187	5
188	0.7	188	1	188	1	1			188	5
